# Supplementary material
Source: publisher site journal article supplement (https://www.spandidos-publications.com/955/downloadSupplementary)

Figure S1. Confirmation of CDK6 overexpression by western blot analysis. \* $P < 0.05$ . CDK6, cyclin-dependent kinase 6; C, normal control; NC, negative control.

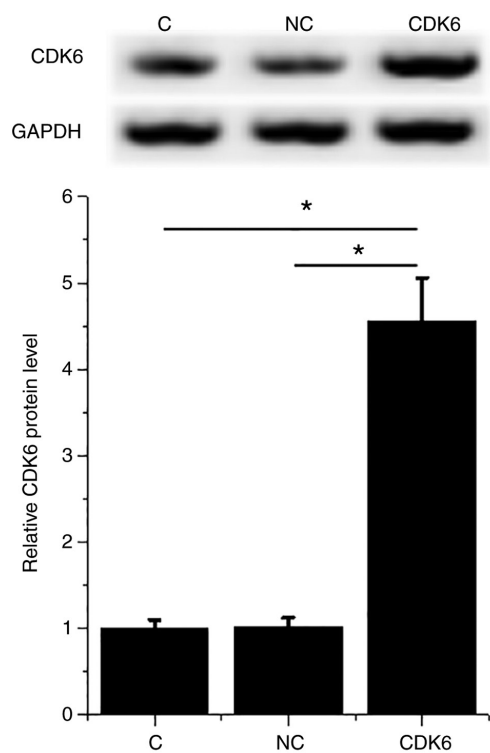

Supplement: Supplementary file 1 [file downloadSupplementary]
